# Supplementary material
Source: publisher figshare collection journal article supplement (https://acs.figshare.com/ndownloader/files/5333464)
Supplement: Supplementary file 1 [file 5333464]

# **Silicon Diphosphide: A Si-Based Three-Dimensional Crystalline Framework as a High-Performance Li-Ion Battery Anode**

*Hyuk-Tae Kwon<sup>a</sup>, Churl-Kyoung Lee<sup>a</sup>, Ki-Joon Jeon,<sup>\*b</sup> and Cheol-Min Park<sup>\*a</sup>*

<sup>a</sup>School of Materials Science and Engineering, Kumoh National Institute of Technology, 61 Daehak-ro, Gumi, Gyeongbuk 39177, Republic of Korea

<sup>b</sup>Department of Environmental Engineering, Inha University, 100 Inha-ro, Nam-gu, Incheon, 22212, Republic of Korea

---

\* Corresponding authors.

<sup>\*</sup>Ki-Joon Jeon. Tel.: +82-32-860-7509

*E-mail:* [kjjeon@inha.ac.kr](mailto:kjjeon@inha.ac.kr)

<sup>\*</sup>Cheol-Min Park. Tel.: +82-54-478-7746; Fax: +82-54-478-7769

*E-mail:* [cmpark@kumoh.ac.kr](mailto:cmpark@kumoh.ac.kr)

## I. Preparation of the $\text{SiP}_2$

The  $\text{SiP}_2$  was synthesized using a HEBM process for 20 h and it was analyzed using HRTEM to confirm its crystallinity, as shown in Figure S1. HRTEM images combined with SAED patterns confirmed well developed, crystalline micron-sized  $\text{SiP}_2$  particles consisting of agglomerated ca. 20-30 nm sized nanocrystallites (Figure S1).

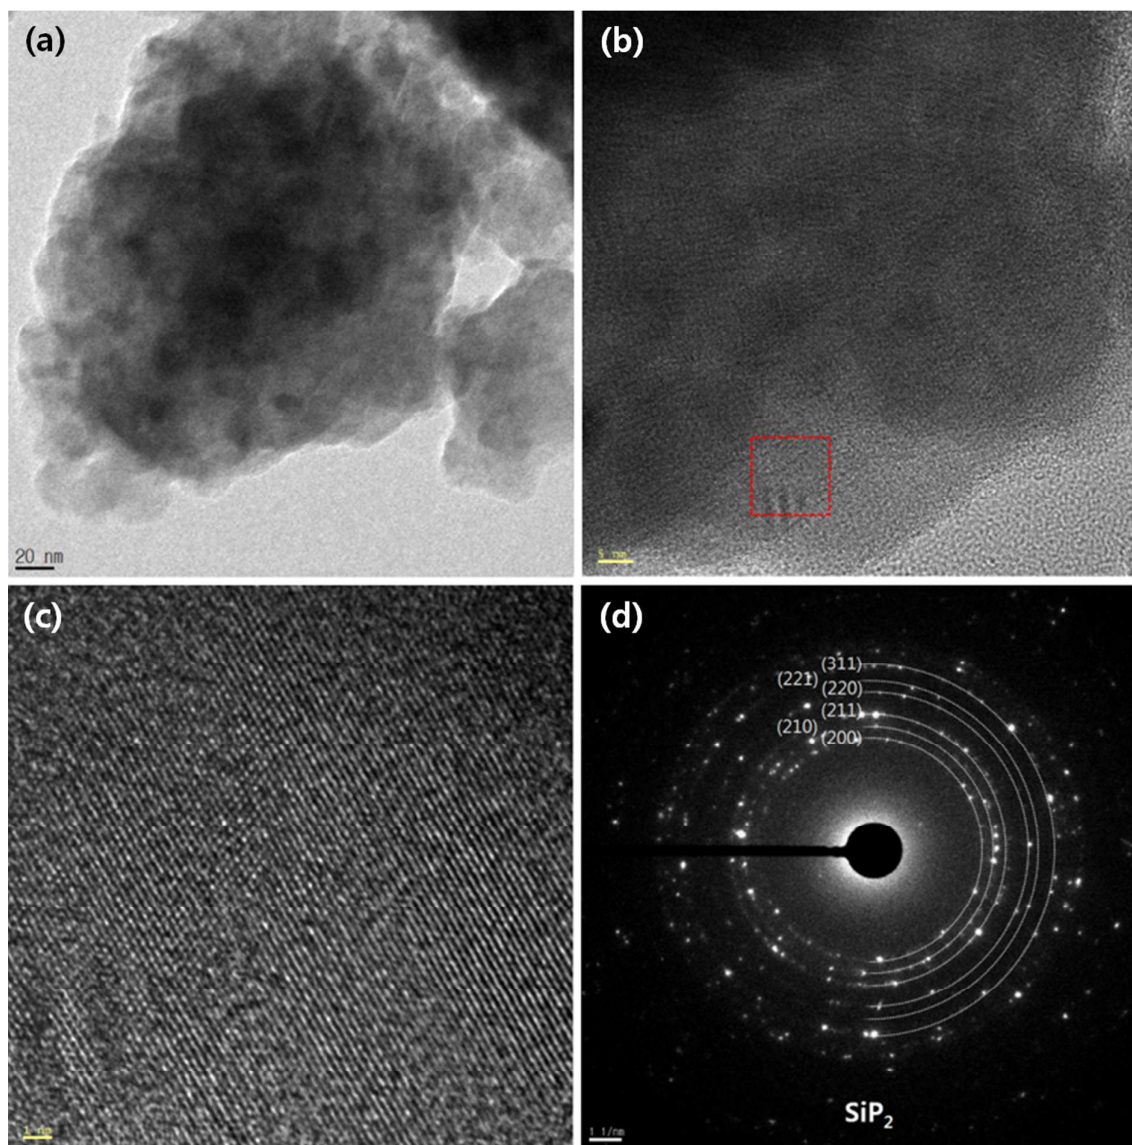

**Figure S1. Morphological characteristics of the  $\text{SiP}_2$ .** (a) TEM bright-field image. (b) HRTEM image. (c) HRTEM image corresponding to the selected regions in the HRTEM image. (d) SAED patterns of the selected regions in the HRTEM image.

## II. Electrochemical performances of the Si and P electrodes

Figures S2(a) and S2(b) show the voltage profiles for the Si and black-P electrodes at a current density of  $100 \text{ mA g}^{-1}$ . The Si electrode showed very high discharge and charge capacities of  $3645$  and  $2510 \text{ mAh g}^{-1}$ , respectively, with a Coulombic efficiency of  $68.9\%$  [Fig. S2(a)]. Given the theoretical capacity of  $3578 \text{ mAh g}^{-1}$  (calculated based on the final phase of  $\text{Li}_{15}\text{Si}_4$ ) of Si at room temperature, we could conclude that the Si was fully reacted with Li. However, the Si electrode exhibited poor capacity retention, corresponding to approximately  $11.4\%$  of the initial charge capacity after the 10th cycle. Figure S2(b) shows the voltage profile of the black P, which was synthesized using high-energy ball milling for 24 h. The black-P electrode also showed very high discharge and charge capacities of  $2257$  and  $1280 \text{ mAh g}^{-1}$ , respectively, with a Coulombic efficiency of  $56.7\%$ . Given the theoretical capacity of  $2596 \text{ mAh g}^{-1}$  (calculated based on the final phase of  $\text{Li}_3\text{P}$ ) of P, the P was highly reacted with Li. However, the P electrode also exhibited poor capacity retention, corresponding to approximately  $3.9\%$  of the initial charge capacity after the 10th cycle.

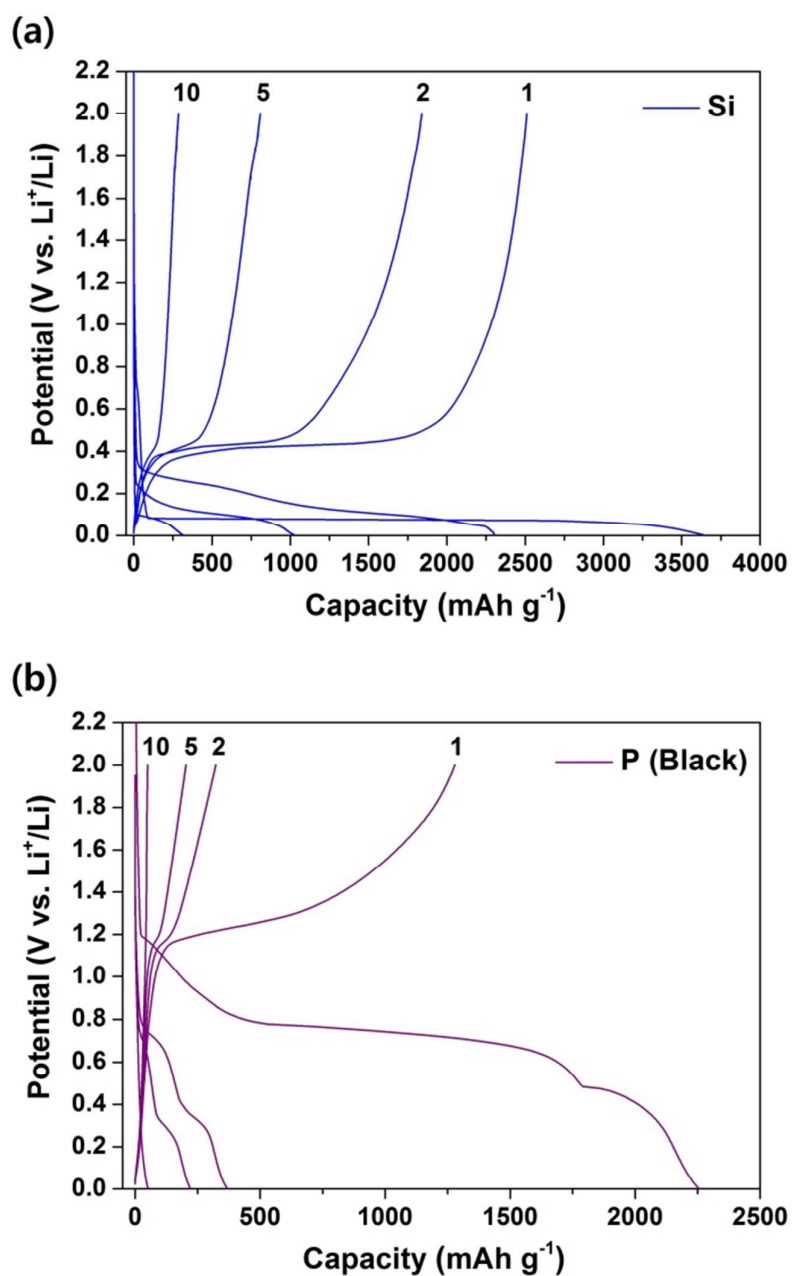

**Figure S2.** Electrochemical performances of the Si and black-P electrodes. (a) Voltage profiles of the Si electrode at a current density of 100 mA g<sup>-1</sup>. (b) Voltage profiles of the black-P electrode at a current density of 100 mA g<sup>-1</sup>.

### III. $^7\text{Li}$ NMR spectra analysis of the $\text{SiP}_2$ electrode during initial cycling

For the solid-state NMR, all spectra were obtained using a 400 MHz solid-state NMR at KBSI Daegu center in Korea, operating at 79.488 MHz for  $^{29}\text{Si}$  and 155.5 MHz for  $^7\text{Li}$ . The lithiated- and delithiated-electrode samples of about 20 mg each were dried and transferred to 4 mm zirconia rotors in an Ar-filled glove box. The rotors were sealed with Kel-F caps that were airtight. All spectra were acquired under magic-angle-spinning (MAS) conditions with spin rates of 10 kHz for  $^{29}\text{Si}$  and 12 kHz for  $^7\text{Li}$ , using a single-pulse sequence. The pulse-repetition-delay times were 3 s for  $^{29}\text{Si}$  and 5 s for  $^7\text{Li}$ . All of the units in the chemical shifts are expressed in ppm and referenced relative to tetramethylsilane for  $^{29}\text{Si}$  and to  $\text{LiAsF}_6$  for  $^7\text{Li}$ .

Solid-state  $^7\text{Li}$  NMR was performed at the selected potentials indicated in the DCP [Fig. 2(a)], and the results are presented in Figure S3. When the potential was lowered from the open-circuit potential to 0.55 V, the  $^7\text{Li}$  NMR results depicted two peaks comprised of a large peak at 3.3 ppm, corresponding to the  $\text{Li}_x\text{SiP}_2$  ( $x \leq 1.8$ ) phase, and a small Li-salt-in-electrolyte peak of -0.85 ppm ( $t_1$  in Fig. S3)<sup>1,2</sup>. At a further discharged state of 0.25 V, the  $^7\text{Li}$  NMR peak was slightly shifted to the left (6.7 ppm,  $t_2$  in Fig. S3). When the potential was fully discharged at 0 V, the  $^7\text{Li}$  NMR ( $t_3$  in Fig. S3) spectrum definitely showed the formation of the  $\text{Li}_{13}\text{Si}_4$  (11.5 ppm) and  $\text{Li}_3\text{P}$  (22.2 ppm) phases at room temperature<sup>3</sup>, whereas when the  $\text{SiP}_2$  electrode was in a fully charged state of 2 V, the  $^7\text{Li}$  NMR peak was slightly shifted to the right (4.2 ppm,  $t_5$  in Fig. S3), results that were caused by Li remaining after the charge reaction<sup>4</sup>.

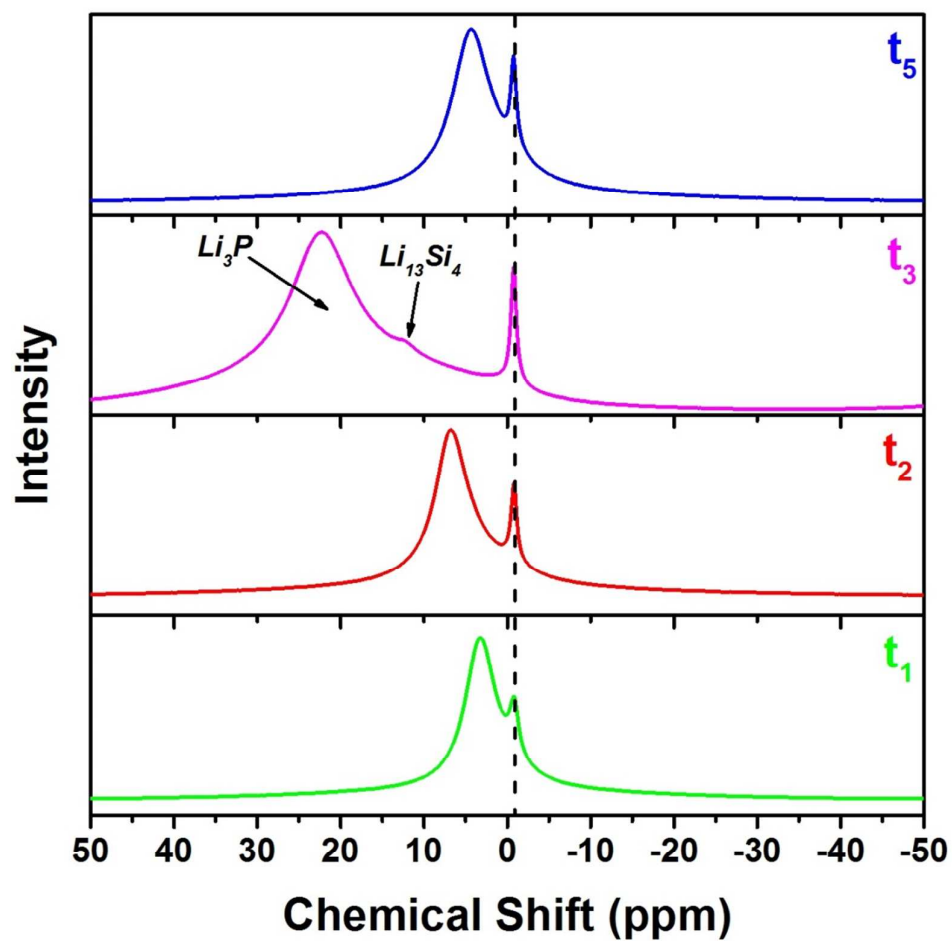

**Figure S3.**  $^7\text{Li}$  NMR spectra analysis for the  $\text{SiP}_2$  electrode at the selected potentials indicated in the DCP results.

#### IV. Preparation of the nanostructured SiP<sub>2</sub>/C composite

The nanostructured SiP<sub>2</sub>/C composite was prepared using an additional HEBM process for 6 h and was analyzed using XRD, as shown in Figure S4. The XRD pattern of the nanostructured SiP<sub>2</sub>/C composite confirmed that no other crystalline phases were present.

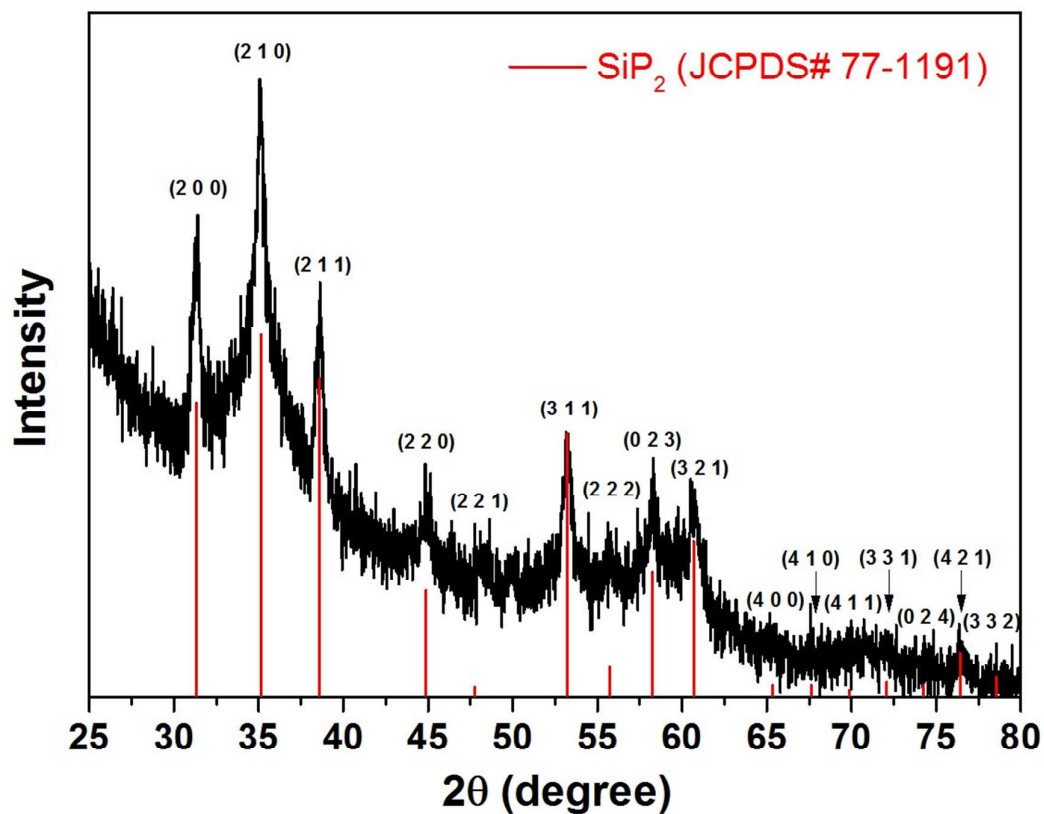

**Figure S4.** XRD analysis confirming the phases of the nanostructured SiP<sub>2</sub>/C composite.

## **V. Electrochemical performance of the ball-milled carbon (Super P) electrode**

Figure S5 shows the electrochemical performance of the ball-milled amorphous-carbon (Super P) electrode. Figure S5(a) shows the voltage profile of the ball-milled amorphous-carbon electrode at a current density of  $100 \text{ mA g}^{-1}$ . The ball-milled amorphous-carbon electrode showed high initial discharge and charge capacities of 916 and 560  $\text{mAh g}^{-1}$ , respectively, with a Coulombic efficiency of 61.1%. The ball-milled amorphous-carbon electrode also showed a relatively stable capacity retention, corresponding to approximately 81.1% of the initial charge capacity after the 100th cycle (Fig. S5(b)).



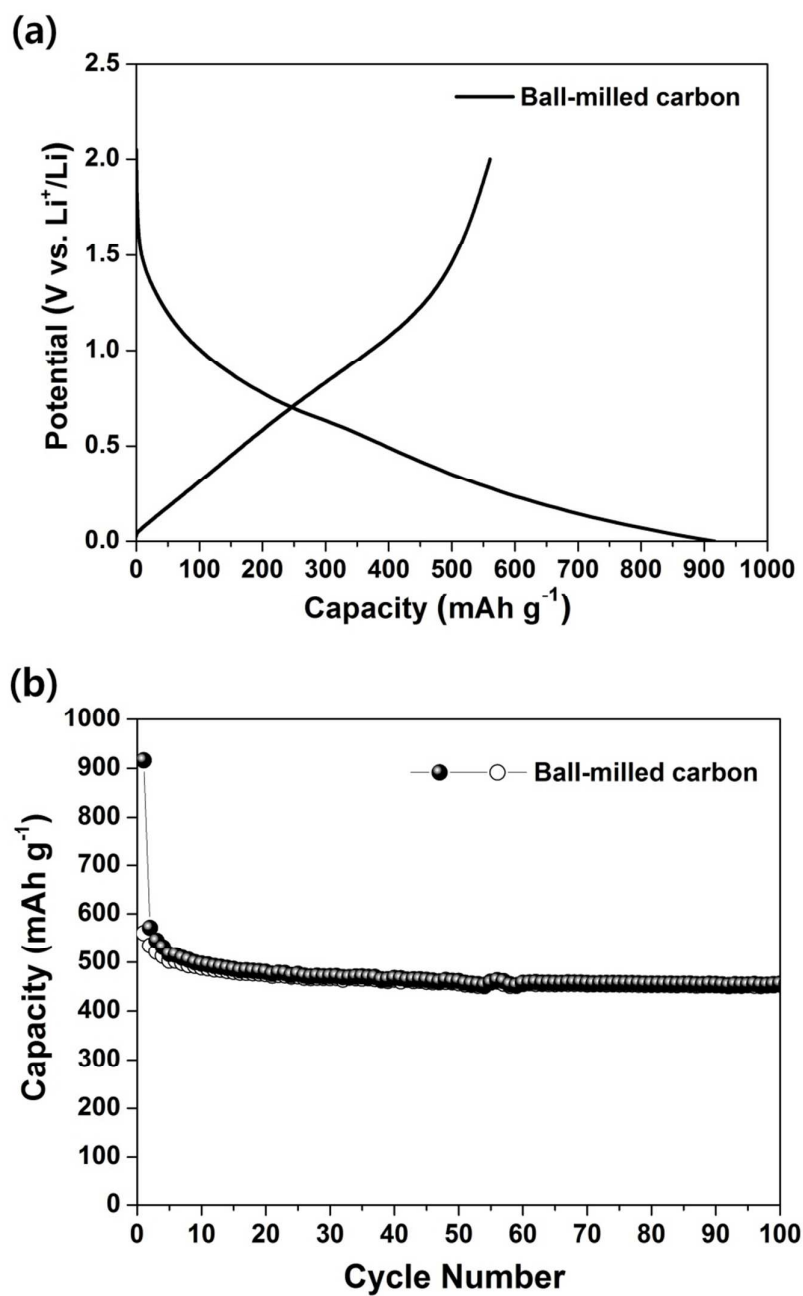

**Figure S5.** Electrochemical performances of the ball-milled amorphous-carbon (Super P) electrode. (a) Voltage profiles of the ball-milled amorphous-carbon electrode at a current density of 100 mA g<sup>-1</sup>. (b) Cycle behavior of the ball-milled amorphous-carbon electrode.

## VI. Differential capacity plot of the SiP<sub>2</sub>/C nanocomposite electrode

Figure S6 shows the DCP result of SiP<sub>2</sub>/C nanocomposite electrode was well coincided with that of SiP<sub>2</sub> electrode, which demonstrates that the SiP<sub>2</sub>/C nanocomposite electrode also has the three-step electrochemical-reaction mechanism, sequentially comprised of a topotactic transition (0.55-2 V), an amorphization (0.25-2 V), and a conversion (0-2 V).

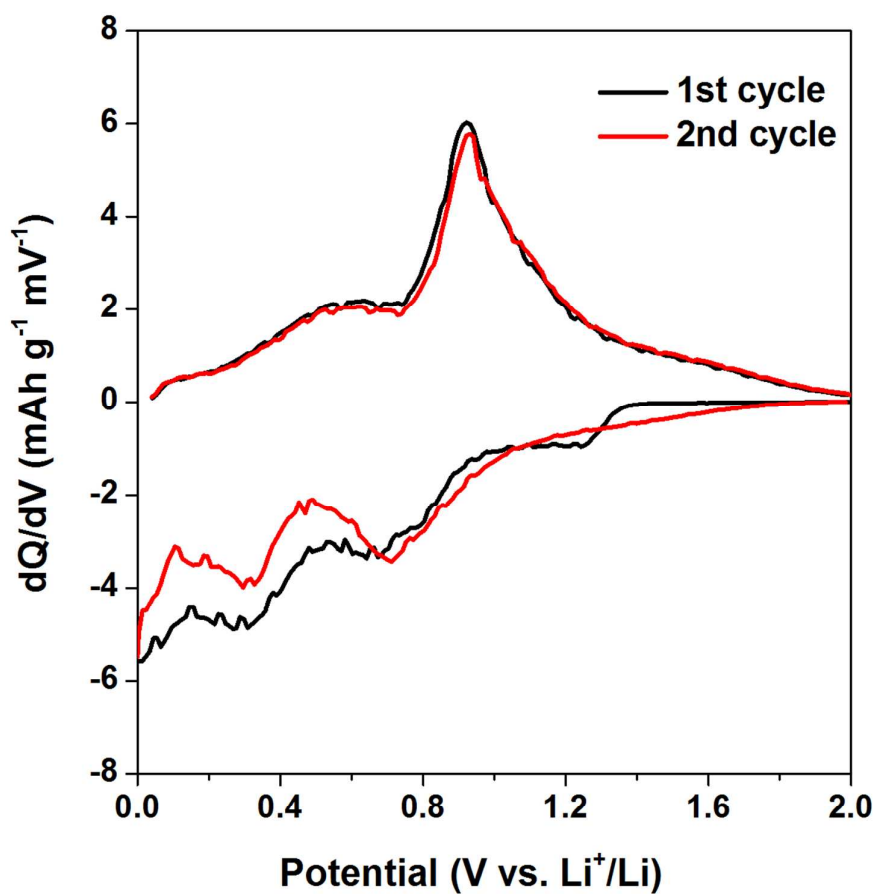

**Figure S6.** DCP result of SiP<sub>2</sub>/C nanocomposite electrode for the first and second cycles.

## VII. Rate-capability tests of the nanostructured SiP<sub>2</sub>/C composite electrode

The rate-capability tests of the SiP<sub>2</sub>/C nanocomposite electrode were also performed within the potential range of the amorphization (0.25-2 V) and topotactic-transition (0.55-2 V) steps. Figure S7 shows the voltage profiles of the SiP<sub>2</sub>/C nanocomposite electrode as a function of the  $C$  rate, where  $C$  is defined as the full use of the restricted charge capacity of 1100 mAh g<sup>-1</sup> (amorphization step) and 500 mAh g<sup>-1</sup> (topotactic-transition step) in 1 h. In the case of the amorphization step [Fig. S7(a)], it had high charge capacities of 990 (1  $C$  rate) and 820 mAh g<sup>-1</sup> (3  $C$  rate), respectively, corresponding to approximately 88% and 73% of the charge capacity at a rate of 0.1  $C$ . In the case of the potential range of the topotactic-transition step [Fig. S7(b)], it had charge capacities of 455 (1  $C$  rate) and 395 mAh g<sup>-1</sup> (3  $C$  rate), corresponding to approximately 93% and 81%, respectively, of the charge capacity at a rate of 0.1  $C$  with stable cycling behavior.

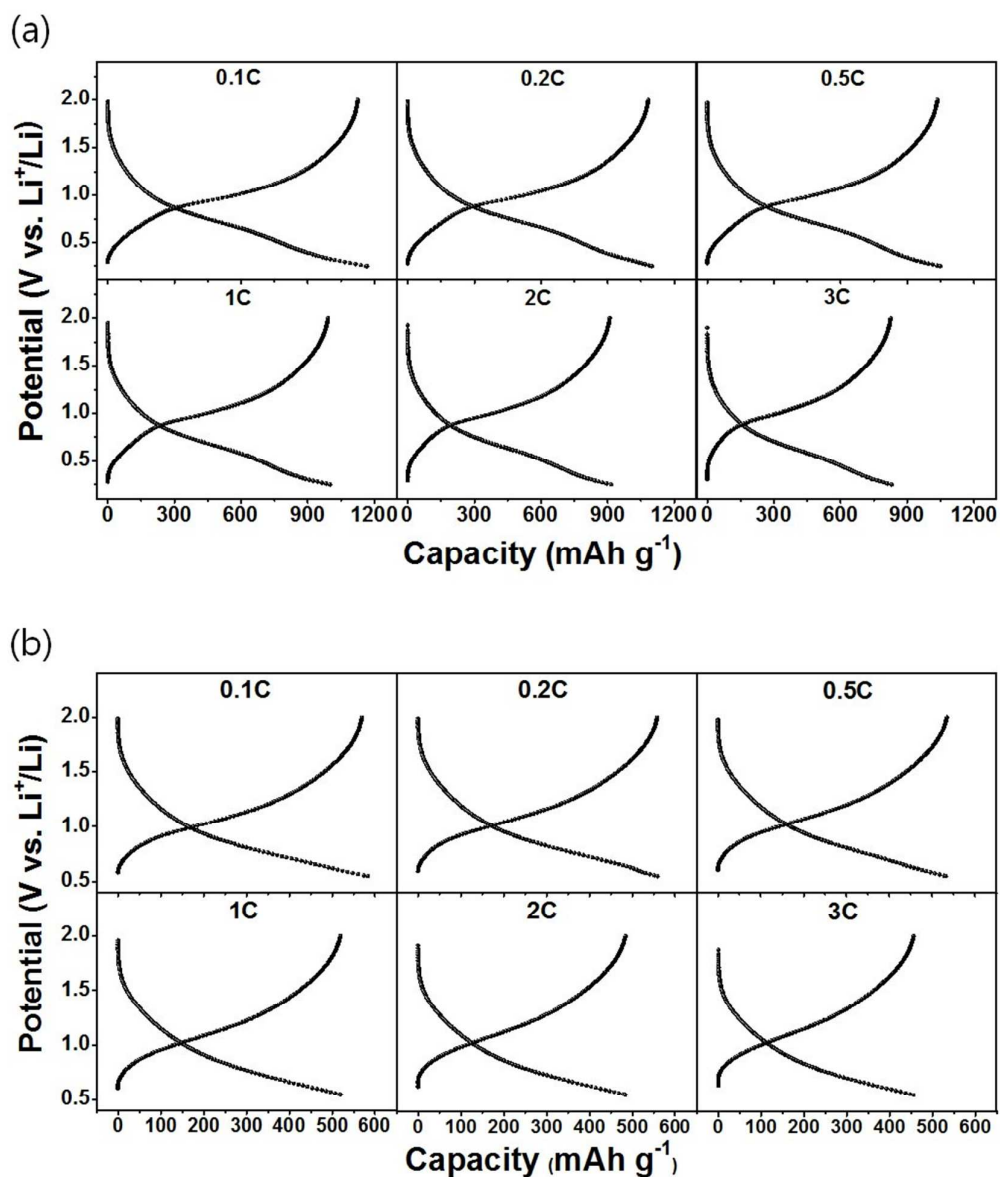

**Figure S7.** Rate-capability results of the nanostructured SiP<sub>2</sub>/C composite electrode. (a) Voltage profiles at different current rates within the potential range of the amorphization step (0.25-2 V). (b) Voltage profiles at different current rates within the potential range of the topotactic-transition step (0.55-2 V).

## References

- [1] Goward, G. R.; Nazar, L. F.; Power, W. P. Electrochemical and Multinuclear Solid-State NMR Studies of Tin Composite Oxide Glasses as Anodes for Li Ion Batteries. *J. Mater. Chem.* **2000**, *10*, 1241-1249.
- [2] Marino, C.; Boulet, L.; Gaveau, P.; Fraisse, B.; Monconduit, L. Nanoconfined Phosphorus in Mesoporous Carbon as An Electrode for Li-Ion Batteries: Performance and Mechanism. *J. Mater. Chem.* **2012**, *22*, 22713-22720.
- [3] Key, B.; Bhattacharyya, R.; Morcrette, M.; Seznec, V.; Tarascon, J.-M.; Grey, C. P. Real-Time NMR Investigations of Structural Changes in Silicon Electrodes for Lithium-Ion Batteries. *J. Am. Chem. Soc.* **2009**, *131*, 9239-9249.
- [4] Key, B.; Morcrette, M.; Tarascon, J.-M.; Grey, C. P. Pair Distribution Function Analysis and Solid State NMR Studies of Silicon Electrodes for Lithium Ion Batteries: Understanding the (De)Lithiation Mechanisms. *J. Am. Chem. Soc.* **2011**, *133*, 503-512.
